# Supplementary material
Source: PubMed Central journal article supplement (PMC1895966)

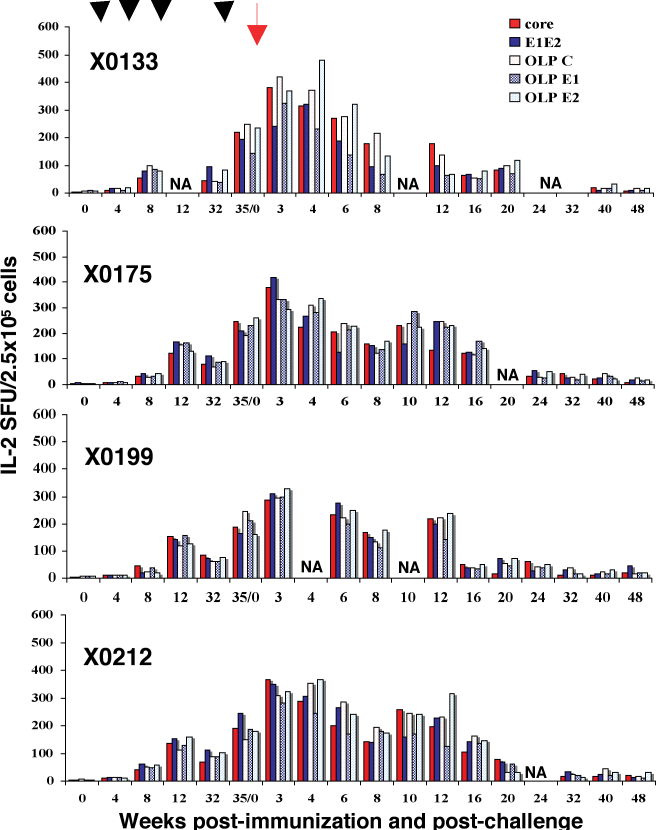

Supplement: pnas_0702162104_1.pdf [file pnas_0702162104_1.pdf]
